# Supplementary material
Source: PubMed Central journal article supplement (PMC4490779)
Supplement: Supp_Table1.pdf [file Supp_Table1.pdf]

## Supplementary Data

SUPPLEMENTARY TABLE S1. AGE-ADJUSTED CORRELATION COEFFICIENTS AMONG SELF-REPORTED  
REPRODUCTIVE TRACT INFECTIONS

| <i>Reproductive tract infections<sup>a</sup></i> | <i>Spearman partial correlation coefficients</i> |                            |                    |                  |                       |                      |
|--------------------------------------------------|--------------------------------------------------|----------------------------|--------------------|------------------|-----------------------|----------------------|
|                                                  | N = 1653                                         |                            |                    |                  |                       |                      |
|                                                  | <i>Chlamydia</i>                                 | <i>Bacterial vaginosis</i> | <i>Trichomonas</i> | <i>Gonorrhea</i> | <i>Genital herpes</i> | <i>Genital warts</i> |
| Chlamydia                                        | 1                                                |                            |                    |                  |                       |                      |
| Bacterial vaginosis                              | 0.20                                             | 1                          |                    |                  |                       |                      |
| Trichomonas                                      | 0.24                                             | 0.24                       | 1                  |                  |                       |                      |
| Gonorrhea                                        | 0.31                                             | 0.13                       | 0.23               | 1                |                       |                      |
| Genital herpes                                   | 0.08                                             | 0.12                       | 0.08               | 0.09             | 1                     |                      |
| Genital warts                                    | 0.05                                             | 0.07                       | 0.07               | 0.04             | 0.11                  | 1                    |

<sup>a</sup>Pelvic inflammatory disease is not included because it can be a mediator in associations between the above listed reproductive tract infections and fibroids, thus precluding its inclusion in a model with them.
