# Supplementary material
Source: PubMed Central journal article supplement (PMC4490779)
Supplement: Supp_Table2.pdf [file Supp_Table2.pdf]

SUPPLEMENTARY TABLE S2. PERCENT DISTRIBUTIONS OF COVARIATES BY SELF-REPORTED REPRODUCTIVE TRACT INFECTION STATUS

| <i>Covariate</i>                                           | <i>PID<br/>Yes<br/>(n=162)<br/>%</i> | <i>Chlamydia<br/>Yes<br/>(n=628)<br/>%</i> | <i>Bacterial<br/>vaginosis<br/>Yes<br/>(n=624)<br/>%</i> | <i>Trichomonas<br/>Yes<br/>(n=530)<br/>%</i> | <i>Gonorrhea<br/>Yes<br/>(n=323)<br/>%</i> | <i>Genital<br/>herpes<br/>Yes<br/>(n=143)<br/>%</i> | <i>Genital<br/>warts<br/>Yes<br/>(n=113)<br/>%</i> |
|------------------------------------------------------------|--------------------------------------|--------------------------------------------|----------------------------------------------------------|----------------------------------------------|--------------------------------------------|-----------------------------------------------------|----------------------------------------------------|
| Age (years)                                                |                                      |                                            |                                                          |                                              |                                            |                                                     |                                                    |
| 23–26                                                      | 24                                   | 33                                         | 28                                                       | 25                                           | 29                                         | 26                                                  | 20                                                 |
| 27–30                                                      | 41                                   | 33                                         | 35                                                       | 34                                           | 36                                         | 34                                                  | 37                                                 |
| ≥31                                                        | 36                                   | 34                                         | 37                                                       | 41                                           | 35                                         | 40                                                  | 43                                                 |
| Education                                                  |                                      |                                            |                                                          |                                              |                                            |                                                     |                                                    |
| ≤High school/GED                                           | 27                                   | 19                                         | 15                                                       | 20                                           | 25                                         | 18                                                  | 16                                                 |
| Some college or technical                                  | 56                                   | 57                                         | 54                                                       | 58                                           | 56                                         | 47                                                  | 49                                                 |
| ≥Bachelors                                                 | 17                                   | 24                                         | 31                                                       | 22                                           | 19                                         | 36                                                  | 35                                                 |
| BMI (kg/m <sup>2</sup> )                                   |                                      |                                            |                                                          |                                              |                                            |                                                     |                                                    |
| 15–24                                                      | 20                                   | 18                                         | 20                                                       | 14                                           | 21                                         | 15                                                  | 18                                                 |
| 25–29                                                      | 20                                   | 25                                         | 25                                                       | 19                                           | 25                                         | 33                                                  | 24                                                 |
| 30–34                                                      | 18                                   | 20                                         | 22                                                       | 20                                           | 20                                         | 21                                                  | 26                                                 |
| ≥35                                                        | 43                                   | 37                                         | 33                                                       | 47                                           | 35                                         | 32                                                  | 33                                                 |
| Alcohol at age when drinking the most <sup>a</sup> (years) |                                      |                                            |                                                          |                                              |                                            |                                                     |                                                    |
| Low                                                        | 21                                   | 21                                         | 18                                                       | 17                                           | 20                                         | 18                                                  | 18                                                 |
| Moderate                                                   | 22                                   | 31                                         | 36                                                       | 30                                           | 31                                         | 41                                                  | 36                                                 |
| Heavy                                                      | 57                                   | 48                                         | 46                                                       | 53                                           | 50                                         | 41                                                  | 46                                                 |
| Parity                                                     |                                      |                                            |                                                          |                                              |                                            |                                                     |                                                    |
| Nulliparous                                                | 30                                   | 33                                         | 36                                                       | 32                                           | 30                                         | 43                                                  | 40                                                 |
| Parous                                                     | 70                                   | 68                                         | 64                                                       | 68                                           | 70                                         | 57                                                  | 60                                                 |
| Depo-Provera                                               |                                      |                                            |                                                          |                                              |                                            |                                                     |                                                    |
| Never used                                                 | 48                                   | 52                                         | 56                                                       | 50                                           | 46                                         | 52                                                  | 53                                                 |
| Ever used                                                  | 52                                   | 48                                         | 44                                                       | 50                                           | 54                                         | 48                                                  | 47                                                 |
| Age at menarche (years)                                    |                                      |                                            |                                                          |                                              |                                            |                                                     |                                                    |
| 7–10                                                       | 22                                   | 19                                         | 17                                                       | 20                                           | 18                                         | 20                                                  | 15                                                 |
| 11–19                                                      | 78                                   | 81                                         | 83                                                       | 80                                           | 82                                         | 80                                                  | 85                                                 |
| Sex partners before age 20                                 |                                      |                                            |                                                          |                                              |                                            |                                                     |                                                    |
| ≤1                                                         | 14                                   | 12                                         | 17                                                       | 13                                           | 12                                         | 16                                                  | 17                                                 |
| 2–5                                                        | 49                                   | 48                                         | 49                                                       | 50                                           | 43                                         | 51                                                  | 42                                                 |
| ≥6                                                         | 38                                   | 40                                         | 34                                                       | 38                                           | 45                                         | 33                                                  | 42                                                 |
| Age at first sex (years)                                   |                                      |                                            |                                                          |                                              |                                            |                                                     |                                                    |
| ≤14                                                        | 43                                   | 38                                         | 35                                                       | 41                                           | 42                                         | 40                                                  | 33                                                 |
| 15–16                                                      | 32                                   | 38                                         | 37                                                       | 34                                           | 36                                         | 25                                                  | 34                                                 |
| ≥17                                                        | 25                                   | 24                                         | 28                                                       | 25                                           | 23                                         | 35                                                  | 34                                                 |

<sup>a</sup>Low drinkers were those who never had 10 or more drinks in a year. Heavy drinkers were those who usually drank 6 or more drinks on days when they drank or drank 4 or more drinks per sitting at least 2 to 3 times a month. Moderate drinkers were all others. BMI, body mass index; GED, general education degree; PID, pelvic inflammatory disease.
