# Supplementary material
Source: PubMed Central journal article supplement (PMC4490779)
Supplement: Supp_Table3.pdf [file Supp_Table3.pdf]

SUPPLEMENTARY TABLE S3. YEARS SINCE FIRST DIAGNOSIS OF REPRODUCTIVE TRACT INFECTIONS

| <i>Reproductive tract infection</i> | <i>Fibroids</i>                   |             | <i>Total<br/>Median years (IQR)</i> |
|-------------------------------------|-----------------------------------|-------------|-------------------------------------|
|                                     | <i>Yes<br/>Median years (IQR)</i> | <i>No</i>   |                                     |
| Any RTI <sup>a</sup>                | 10 (6–14)                         | 8 (5–12)    | 9 (5–13)                            |
| PID                                 | 8.5 (5–12)                        | 7 (4–12)    | 7 (4–12)                            |
| Chlamydia                           | 11 (7–14)                         | 8 (5–12)    | 9 (5–13)                            |
| Bacterial vaginosis                 | 6 (3–10)                          | 6 (3–9)     | 6 (3–10)                            |
| Trichomonas                         | 8 (3–12)                          | 7 (4–11)    | 7 (4–11)                            |
| Gonorrhea                           | 12 (8–15)                         | 8.5 (5–12)  | 9 (6–13)                            |
| Genital herpes                      | 7 (5–12)                          | 5 (2–9)     | 6 (2–10)                            |
| Genital warts                       | 6 (2–11.5)                        | 10 (6–12.5) | 10 (6–13)                           |

<sup>a</sup>Includes pelvic inflammatory disease, chlamydia, bacterial vaginosis, trichomonas, gonorrhea, genital herpes, and genital warts. IQR, interquartile range; RTI, reproductive tract infection.
