# Supplementary material
Source: PubMed Central journal article supplement (PMC4490779)
Supplement: Supp_Table4.pdf [file Supp_Table4.pdf]

SUPPLEMENTARY TABLE S4. ADJUSTED ODDS RATIOS FOR FIBROIDS ACCORDING TO SELF-REPORTED HISTORY OF NUMBER OF DIFFERENT REPRODUCTIVE TRACT INFECTIONS AND NUMBER OF DIAGNOSES FOR EACH INFECTION

| <i>Reproductive tract infections<sup>a</sup></i> | <i>Fibroids</i>                                     |                                          | <i>Age-adjusted</i><br><i>OR (95% CI)</i> | <i>Multivariable-adjusted<sup>b</sup></i><br><i>OR (95% CI)</i> |
|--------------------------------------------------|-----------------------------------------------------|------------------------------------------|-------------------------------------------|-----------------------------------------------------------------|
|                                                  | <i>Yes</i><br>(N = 363)<br><i>n (%)<sup>a</sup></i> | <i>No</i><br>(N = 1,293)<br><i>n (%)</i> |                                           |                                                                 |
| Number of different RTIs reported                |                                                     |                                          |                                           |                                                                 |
| 0                                                | 101 (28)                                            | 381 (30)                                 | 1 (ref)                                   | 1 (ref)                                                         |
| 1                                                | 103 (28)                                            | 350 (27)                                 | 1.08 (0.79–1.49)                          | 1.19 (0.86–1.64)                                                |
| 2                                                | 85 (23)                                             | 238 (18)                                 | 1.32 (0.94–1.85)                          | 1.41 (0.99–2.01)                                                |
| 3+                                               | 74 (20)                                             | 320 (25)                                 | 0.82 (0.58–1.15)                          | 0.91 (0.63–1.30)                                                |
| Missing                                          |                                                     | 4                                        |                                           |                                                                 |
| PID diagnoses ( <i>n</i> )                       |                                                     |                                          |                                           |                                                                 |
| 0                                                | 329 (91)                                            | 1,164 (90)                               | 1 (ref)                                   | 1 (ref)                                                         |
| 1                                                | 28 (8)                                              | 104 (8)                                  | 0.94 (0.60–1.47)                          | 0.98 (0.62–1.55)                                                |
| 2+                                               | 6 (2)                                               | 24 (2)                                   | 0.75 (0.30–1.88)                          | 0.79 (0.31–2.02)                                                |
| Missing                                          |                                                     | 1                                        |                                           |                                                                 |
| Chlamydia diagnoses ( <i>n</i> )                 |                                                     |                                          |                                           |                                                                 |
| 0                                                | 238 (66)                                            | 788 (61)                                 | 1 (ref)                                   | 1 (ref)                                                         |
| 1                                                | 80 (22)                                             | 339 (26)                                 | 0.82 (0.61–1.09)                          | 0.86 (0.64–1.16)                                                |
| 2+                                               | 45 (12)                                             | 164 (13)                                 | 0.92 (0.63–1.32)                          | 1.02 (0.70–1.50)                                                |
| Missing                                          |                                                     | 2                                        |                                           |                                                                 |
| Bacterial vaginosis diagnoses ( <i>n</i> )       |                                                     |                                          |                                           |                                                                 |
| 0                                                | 216 (60)                                            | 815 (63)                                 | 1 (ref)                                   | 1 (ref)                                                         |
| 1                                                | 50 (14)                                             | 164 (13)                                 | 1.22 (0.85–1.74)                          | 1.23 (0.85–1.78)                                                |
| 2+                                               | 97 (27)                                             | 313 (24)                                 | 1.10 (0.83–1.45)                          | 1.11 (0.83–1.49)                                                |
| Missing                                          |                                                     | 1                                        |                                           |                                                                 |
| Trichomonas diagnoses ( <i>n</i> )               |                                                     |                                          |                                           |                                                                 |
| 0                                                | 247 (68)                                            | 878 (68)                                 | 1 (ref)                                   | 1 (ref)                                                         |
| 1                                                | 76 (21)                                             | 276 (21)                                 | 0.91 (0.68–1.23)                          | 0.93 (0.68–1.27)                                                |
| 2+                                               | 40 (11)                                             | 138 (11)                                 | 0.88 (0.60–1.30)                          | 0.90 (0.60–1.35)                                                |
| Missing                                          |                                                     | 1                                        |                                           |                                                                 |
| Gonorrhea diagnoses ( <i>n</i> )                 |                                                     |                                          |                                           |                                                                 |
| 0                                                | 301 (83)                                            | 1,031 (78)                               | 1 (ref)                                   | 1 (ref)                                                         |
| 1                                                | 41 (11)                                             | 190 (15)                                 | 0.74 (0.51–1.07)                          | 0.81 (0.56–1.19)                                                |
| 2+                                               | 21 (6)                                              | 71 (6)                                   | 1.01 (0.61–1.69)                          | 1.21 (0.71–2.04)                                                |
| Missing                                          |                                                     | 1                                        |                                           |                                                                 |

Any “prefer not to answer” response was coded as missing.

<sup>a</sup>Genital herpes was not included because the number of times diagnosed was not applicable, and genital warts was not included because only 9 participants were diagnosed more than once.

<sup>b</sup>Logistic regression model adjusted for age (continuous), education, body mass index, alcohol, menarche, parity, and Depo-Provera use. CI, confidence interval; OR, odds ratio.
